# Supplementary material for: Identification of Novel Genes Associated with Chronic Obstructive Pulmonary Disease Using Different Penalized Logistics Regression with High-Dimensional Biological Data from Human Sputum Cells
Source: Research Square preprint supplement (doi:10.21203/rs.3.rs-240116/v1), 2021-02-17
Supplement: Supplementary file 1 [file d5850d386dbb81e474b1684b.xlsx]

## Sheet: Sheet1
Table 1: Differential analysis based on the relative expression of the top 250 candidate genes between moderate (stage 2) and severe patients (stage 3 and stage 4). The Adj. P is based on the marginally adjusted 𝑝 values by the Benjamini-Hochberg-FDR correction at α =0.05
ID	Adjusted P-value	P-value	t	B	logFC	Gene symbol	Gene title
1569072_s_at	2.42e-07	4.42e-12	-7.55	16.99	-1.31	ABCB5	ATP binding cassette subfamily B member 5
230932_at	4.12e-07	1.51e-11	7.33	15.82	0.94	RNF130	ring finger protein 130
215909_x_at	6.66e-07	3.65e-11	-7.17	14.99	-0.42	MINK1	misshapen like kinase 1
211025_x_at	6.76e-07	4.95e-11	-7.11	14.7	-0.42	COX5B	cytochrome c oxidase subunit 5B
227073_at	7.38e-07	6.79e-11	7.05	14.4	0.53	MAP3K2	mitogen-activated protein kinase kinase kinase 2
202494_at	7.38e-07	1.06e-10	-6.97	13.97	-0.61	PPIE	peptidylprolyl isomerase E
211708_s_at	7.38e-07	1.1e-10	-6.96	13.95	-1.47	SCD	stearoyl-CoA desaturase
226393_at	7.38e-07	1.16e-10	-6.95	13.89	-0.97	CYP2U1	cytochrome P450 family 2 subfamily U member 1
211863_x_at	7.38e-07	1.21e-10	-6.94	13.85	-0.84	HFE	hemochromatosis
228376_at	7.82e-07	1.56e-10	-6.89	13.61	-0.93	GGTA1P	glycoprotein, alpha-galactosyltransferase 1 pseudogene
234153_at	7.82e-07	1.57e-10	6.89	13.6	1.18
211300_s_at	1.74e-06	4.32e-10	-6.7	12.65	-0.79	TP53	tumor protein p53
217891_at	1.74e-06	4.43e-10	-6.7	12.63	-0.81	C16orf58	chromosome 16 open reading frame 58
211162_x_at	1.74e-06	4.46e-10	-6.69	12.62	-1.29	SCD	stearoyl-CoA desaturase
243463_s_at	1.79e-06	5.11e-10	6.67	12.49	0.47	RIT1	Ras like without CAAX 1
221550_at	1.79e-06	5.5e-10	-6.65	12.42	-0.38	COX15	COX15, cytochrome c oxidase assembly homolog
236223_s_at	1.79e-06	5.89e-10	6.64	12.36	0.43	RIT1	Ras like without CAAX 1
206086_x_at	1.79e-06	5.9e-10	-6.64	12.35	-1.08	HFE	hemochromatosis
217751_at	1.79e-06	6.3e-10	-6.63	12.29	-0.44	GSTK1	glutathione S-transferase kappa 1
235217_at	1.79e-06	6.73e-10	6.62	12.23	0.87	LINC01004	long intergenic non-protein coding RNA 1004
1553857_at	1.79e-06	6.87e-10	-6.61	12.21	-0.59	IGSF22	immunoglobulin superfamily member 22
225253_s_at	1.84e-06	7.42e-10	-6.6	12.14	-0.67	METTL2A///METTL2B	methyltransferase like 2A///methyltransferase like 2B
202017_at	1.87e-06	8e-10	-6.58	12.07	-1.34	EPHX1	epoxide hydrolase 1
214019_at	1.87e-06	8.22e-10	6.58	12.04	0.57
210800_at	1.9e-06	8.67e-10	6.57	11.99	0.84	TIMM8A	translocase of inner mitochondrial membrane 8 homolog A (yeast)
212468_at	1.9e-06	9.04e-10	6.56	11.95	0.62	SPAG9	sperm associated antigen 9
230127_at	2.2e-06	1.09e-09	6.52	11.78	0.79
202343_x_at	2.35e-06	1.2e-09	-6.5	11.68	-0.38	COX5B	cytochrome c oxidase subunit 5B
227024_s_at	2.37e-06	1.26e-09	-6.49	11.64	-0.51	MRPL55	mitochondrial ribosomal protein L55
218394_at	2.48e-06	1.39e-09	-6.47	11.55	-0.61	ROGDI	rogdi homolog
225029_at	2.48e-06	1.4e-09	-6.47	11.54	-0.55	LINC01420	long intergenic non-protein coding RNA 1420
205790_at	2.48e-06	1.53e-09	-6.46	11.45	-0.88	SKAP1	src kinase associated phosphoprotein 1
207479_at	2.48e-06	1.62e-09	6.44	11.4	0.73
212224_at	2.48e-06	1.73e-09	-6.43	11.34	-0.87	ALDH1A1	aldehyde dehydrogenase 1 family member A1
221094_s_at	2.48e-06	1.75e-09	-6.43	11.33	-0.61	ELP3	elongator acetyltransferase complex subunit 3
210864_x_at	2.48e-06	1.75e-09	-6.43	11.33	-0.31	HFE	hemochromatosis
201270_x_at	2.48e-06	1.77e-09	-6.43	11.32	-0.55	NUDCD3	NudC domain containing 3
205011_at	2.48e-06	1.83e-09	-6.42	11.28	-0.79	VWA5A	von Willebrand factor A domain containing 5A
214352_s_at	2.48e-06	1.85e-09	6.42	11.27	0.56	KRAS	KRAS proto-oncogene, GTPase
214888_at	2.48e-06	1.88e-09	6.42	11.26	0.93	CAPN2	calpain 2
217791_s_at	2.48e-06	1.92e-09	-6.41	11.24	-0.56	ALDH18A1	aldehyde dehydrogenase 18 family member A1
224975_at	2.48e-06	1.95e-09	-6.41	11.23	-0.95	NFIA	nuclear factor I A
201432_at	2.48e-06	2e-09	-6.4	11.2	-0.49	CAT	catalase
204518_s_at	2.48e-06	2.05e-09	-6.4	11.18	-1.35	PPIC	peptidylprolyl isomerase C
226388_at	2.48e-06	2.08e-09	-6.4	11.16	-1.35	TCEA3	transcription elongation factor A3
202139_at	2.48e-06	2.11e-09	-6.39	11.15	-0.77	AKR7A2	aldo-keto reductase family 7 member A2
212470_at	2.48e-06	2.13e-09	6.39	11.14	0.55	SPAG9	sperm associated antigen 9
204286_s_at	2.52e-06	2.22e-09	6.38	11.1	0.59	PMAIP1	phorbol-12-myristate-13-acetate-induced protein 1
201943_s_at	2.52e-06	2.26e-09	6.38	11.08	0.68	CPD	carboxypeptidase D
209449_at	2.67e-06	2.52e-09	-6.36	10.98	-0.77	LSM2	LSM2 homolog, U6 small nuclear RNA and mRNA degradation associated
200802_at	2.67e-06	2.73e-09	-6.34	10.91	-0.36	SARS	seryl-tRNA synthetase
201764_at	2.67e-06	2.74e-09	-6.34	10.9	-0.81	TMEM106C	transmembrane protein 106C
208745_at	2.67e-06	2.76e-09	-6.34	10.9	-0.39	ATP5L	ATP synthase, H+ transporting, mitochondrial Fo complex subunit G
1553402_a_at	2.67e-06	2.86e-09	-6.33	10.86	-1.03	HFE	hemochromatosis
1558511_s_at	2.67e-06	2.9e-09	6.33	10.85	0.42	ESYT2	extended synaptotagmin 2
203673_at	2.67e-06	2.91e-09	6.33	10.85	0.78	TG	thyroglobulin
210658_s_at	2.67e-06	2.92e-09	-6.33	10.84	-0.67	GGA2	golgi associated, gamma adaptin ear containing, ARF binding protein 2
203576_at	2.67e-06	3e-09	-6.32	10.82	-0.43	BCAT2	branched chain amino acid transaminase 2
243522_at	2.67e-06	3.05e-09	6.32	10.8	0.75
216032_s_at	2.67e-06	3.07e-09	-6.32	10.8	-0.49	ERGIC3	ERGIC and golgi 3
201487_at	2.67e-06	3.08e-09	-6.32	10.79	-0.59	CTSC	cathepsin C
225647_s_at	2.67e-06	3.1e-09	-6.32	10.79	-0.68	CTSC	cathepsin C
232379_at	2.67e-06	3.13e-09	6.32	10.78	0.62	SKIL	SKI-like proto-oncogene
238035_at	2.67e-06	3.13e-09	6.32	10.78	0.42	SP3	Sp3 transcription factor
1561079_at	2.98e-06	3.54e-09	6.29	10.66	1.01	ANKRD28	ankyrin repeat domain 28
212725_s_at	2.99e-06	3.63e-09	6.29	10.64	0.38	TUG1	taurine up-regulated 1 (non-protein coding)
224699_s_at	2.99e-06	3.74e-09	6.28	10.61	0.37	ESYT2	extended synaptotagmin 2
240924_x_at	2.99e-06	3.77e-09	6.28	10.6	0.8
240432_x_at	2.99e-06	3.8e-09	6.28	10.59	0.45	KLF7	Kruppel like factor 7
214384_s_at	2.99e-06	3.91e-09	6.27	10.57	0.4	DCTN2	dynactin subunit 2
202636_at	2.99e-06	3.92e-09	6.27	10.57	0.52	RNF103	ring finger protein 103
211327_x_at	2.99e-06	3.94e-09	-6.27	10.56	-0.57	HFE	hemochromatosis
201845_s_at	3.05e-06	4.12e-09	6.26	10.52	0.46	RYBP	RING1 and YY1 binding protein
225612_s_at	3.05e-06	4.16e-09	6.26	10.51	0.28	B3GNT5	UDP-GlcNAc:betaGal beta-1,3-N-acetylglucosaminyltransferase 5
236224_at	3.05e-06	4.24e-09	6.26	10.49	0.37	RIT1	Ras like without CAAX 1
212184_s_at	3.05e-06	4.25e-09	6.25	10.49	0.32	TAB2	TGF-beta activated kinase 1/MAP3K7 binding protein 2
229693_at	3.05e-06	4.35e-09	-6.25	10.47	-0.73	TMEM220	transmembrane protein 220
221494_x_at	3.05e-06	4.46e-09	-6.25	10.44	-0.32	EIF3K	eukaryotic translation initiation factor 3 subunit K
201441_at	3.05e-06	4.47e-09	-6.24	10.44	-0.26	COX6B1	cytochrome c oxidase subunit 6B1
221605_s_at	3.05e-06	4.5e-09	-6.24	10.44	-0.64	PIPOX	pipecolic acid and sarcosine oxidase
1560019_at	3.05e-06	4.53e-09	6.24	10.43	1.15	DLGAP1-AS2	DLGAP1 antisense RNA 2
223380_s_at	3.05e-06	4.58e-09	6.24	10.42	0.43	LATS2	large tumor suppressor kinase 2
228031_at	3.05e-06	4.62e-09	6.24	10.41	0.82	TTPAL	alpha tocopherol transfer protein like
201391_at	3.05e-06	4.68e-09	-6.24	10.4	-0.6	TRAP1	TNF receptor associated protein 1
212716_s_at	3.11e-06	4.84e-09	-6.23	10.37	-0.33	EIF3K	eukaryotic translation initiation factor 3 subunit K
207264_at	3.14e-06	4.98e-09	6.22	10.34	0.92	KDELR3	KDEL endoplasmic reticulum protein retention receptor 3
204168_at	3.14e-06	4.99e-09	-6.22	10.34	-0.52	MGST2	microsomal glutathione S-transferase 2
227048_at	3.17e-06	5.14e-09	-6.22	10.31	-1.18	LAMA1	laminin subunit alpha 1
220051_at	3.17e-06	5.17e-09	-6.22	10.3	-1.4	PRSS21	protease, serine 21
210501_x_at	3.24e-06	5.34e-09	-6.21	10.27	-0.33	EIF3K	eukaryotic translation initiation factor 3 subunit K
210453_x_at	3.3e-06	5.52e-09	-6.2	10.24	-0.3	ATP5L	ATP synthase, H+ transporting, mitochondrial Fo complex subunit G
244616_x_at	3.3e-06	5.56e-09	6.2	10.24	0.36	MDM2	MDM2 proto-oncogene
1554093_a_at	3.3e-06	5.61e-09	-6.2	10.23	-0.48	SNAPC5	small nuclear RNA activating complex polypeptide 5
211866_x_at	3.33e-06	5.75e-09	-6.19	10.2	-0.57	HFE	hemochromatosis
241141_at	3.33e-06	5.79e-09	6.19	10.2	0.47	BMP6	bone morphogenetic protein 6
214246_x_at	3.38e-06	6.02e-09	-6.19	10.16	-0.4	MINK1	misshapen like kinase 1
211595_s_at	3.38e-06	6.03e-09	-6.19	10.16	-0.62	MRPS11	mitochondrial ribosomal protein S11
210838_s_at	3.38e-06	6.06e-09	-6.19	10.15	-1.36	ACVRL1	activin A receptor like type 1
228090_at	3.38e-06	6.13e-09	-6.18	10.14	-0.61	NMNAT3	nicotinamide nucleotide adenylyltransferase 3
218454_at	3.42e-06	6.25e-09	-6.18	10.12	-0.39	PLBD1	phospholipase B domain containing 1
218878_s_at	3.45e-06	6.37e-09	6.17	10.11	0.49	SIRT1	sirtuin 1
214864_s_at	3.47e-06	6.47e-09	-6.17	10.09	-0.5	GRHPR	glyoxylate and hydroxypyruvate reductase
241777_x_at	3.52e-06	6.63e-09	6.17	10.07	0.46
201940_at	3.52e-06	6.7e-09	6.16	10.06	0.5	CPD	carboxypeptidase D
242494_at	3.57e-06	6.97e-09	6.16	10.02	0.61
223136_at	3.57e-06	6.99e-09	-6.16	10.02	-0.48	AIG1	androgen induced 1
201840_at	3.57e-06	7e-09	-6.16	10.02	-0.27	NEDD8	neural precursor cell expressed, developmentally down-regulated 8
203179_at	3.57e-06	7.06e-09	-6.15	10.01	-0.58	GALT	galactose-1-phosphate uridylyltransferase
212436_at	3.71e-06	7.4e-09	6.14	9.97	0.48	TRIM33	tripartite motif containing 33
235376_at	3.77e-06	7.59e-09	6.14	9.94	0.65
220933_s_at	3.87e-06	7.89e-09	6.13	9.91	0.36	ZCCHC6	zinc finger CCHC-type containing 6
211729_x_at	3.87e-06	7.92e-09	-6.13	9.9	-0.6	BLVRA	biliverdin reductase A
204266_s_at	4.04e-06	8.4e-09	6.12	9.85	0.45	CHKA	choline kinase alpha
226333_at	4.04e-06	8.42e-09	6.12	9.84	0.42	IL6R	interleukin 6 receptor
215055_at	4.12e-06	8.66e-09	6.11	9.82	0.52	B3GNTL1	UDP-GlcNAc:betaGal beta-1,3-N-acetylglucosaminyltransferase-like 1
218291_at	4.28e-06	9.12e-09	-6.1	9.77	-0.63	LAMTOR2	late endosomal/lysosomal adaptor, MAPK and MTOR activator 2
218267_at	4.28e-06	9.18e-09	-6.1	9.76	-0.38	CINP	cyclin dependent kinase 2 interacting protein
209485_s_at	4.28e-06	9.24e-09	-6.1	9.76	-0.57	OSBPL1A	oxysterol binding protein like 1A
200831_s_at	4.3e-06	9.37e-09	-6.1	9.74	-1.05	SCD	stearoyl-CoA desaturase
228354_at	4.3e-06	9.52e-09	-6.09	9.73	-0.92	MORN4	MORN repeat containing 4
212482_at	4.3e-06	9.58e-09	6.09	9.72	0.49	RMND5A	required for meiotic nuclear division 5 homolog A
221142_s_at	4.3e-06	9.62e-09	-6.09	9.72	-0.72	PECR	peroxisomal trans-2-enoyl-CoA reductase
225312_at	4.3e-06	9.67e-09	-6.09	9.71	-0.32	COMMD6	COMM domain containing 6
208746_x_at	4.37e-06	9.91e-09	-6.09	9.69	-0.3	ATP5L	ATP synthase, H+ transporting, mitochondrial Fo complex subunit G
224970_at	4.42e-06	1.01e-08	-6.08	9.67	-1.03	NFIA	nuclear factor I A
228768_at	4.42e-06	1.04e-08	6.08	9.65	0.39	FNIP1	folliculin interacting protein 1
208906_at	4.42e-06	1.04e-08	-6.08	9.64	-0.78	HNRNPUL2-BSCL2///BSCL2	HNRNPUL2-BSCL2 readthrough (NMD candidate)///BSCL2, seipin lipid droplet biogenesis associated
219070_s_at	4.42e-06	1.06e-08	-6.07	9.63	-0.62	MOSPD3	motile sperm domain containing 3
226520_at	4.42e-06	1.06e-08	6.07	9.62	0.38	LCOR	ligand dependent nuclear receptor corepressor
202682_s_at	4.42e-06	1.06e-08	6.07	9.62	0.32	USP4	ubiquitin specific peptidase 4
225950_at	4.42e-06	1.07e-08	6.07	9.62	0.41	SAMD8	sterile alpha motif domain containing 8
203066_at	4.42e-06	1.07e-08	6.07	9.62	0.39	CHST15	carbohydrate (N-acetylgalactosamine 4-sulfate 6-O) sulfotransferase 15
224478_s_at	4.42e-06	1.08e-08	-6.07	9.61	-0.5	C7orf50	chromosome 7 open reading frame 50
244418_at	4.42e-06	1.08e-08	6.07	9.61	0.59
203772_at	4.43e-06	1.1e-08	-6.07	9.6	-0.8	BLVRA	biliverdin reductase A
221539_at	4.43e-06	1.1e-08	-6.06	9.59	-0.48	EIF4EBP1	eukaryotic translation initiation factor 4E binding protein 1
225616_at	4.51e-06	1.14e-08	-6.06	9.56	-0.62	SPRYD4	SPRY domain containing 4
202532_s_at	4.51e-06	1.15e-08	-6.05	9.55	-0.44	DHFR	dihydrofolate reductase
200783_s_at	4.51e-06	1.15e-08	-6.05	9.55	-0.75	STMN1	stathmin 1
212924_s_at	4.51e-06	1.16e-08	-6.05	9.54	-0.58	LSM4	LSM4 homolog, U6 small nuclear RNA and mRNA degradation associated
202263_at	4.51e-06	1.16e-08	-6.05	9.54	-0.4	CYB5R1	cytochrome b5 reductase 1
223874_at	4.53e-06	1.18e-08	-6.05	9.53	-0.36	ACTR3C	ARP3 actin-related protein 3 homolog C
227976_at	4.58e-06	1.2e-08	-6.05	9.51	-0.63	SMIM10	small integral membrane protein 10
217780_at	4.58e-06	1.22e-08	-6.04	9.49	-0.4	WDR83OS	WD repeat domain 83 opposite strand
206038_s_at	4.58e-06	1.23e-08	6.04	9.49	0.47	NR2C2	nuclear receptor subfamily 2 group C member 2
222759_at	4.58e-06	1.23e-08	6.04	9.49	0.38	KMT5B	lysine methyltransferase 5B
223230_at	4.58e-06	1.24e-08	6.04	9.48	0.32	PRPF38A	pre-mRNA processing factor 38A
206042_x_at	4.58e-06	1.24e-08	-6.04	9.47	-0.48	SNURF///SNRPN	SNRPN upstream reading frame///small nuclear ribonucleoprotein polypeptide N
203771_s_at	4.58e-06	1.25e-08	-6.04	9.47	-0.65	BLVRA	biliverdin reductase A
209077_at	4.58e-06	1.26e-08	-6.04	9.47	-0.39	TXN2	thioredoxin 2
238126_at	4.58e-06	1.27e-08	6.04	9.46	0.66	APTR	Alu-mediated CDKN1A/p21 transcriptional regulator (non-protein coding)
229150_at	4.66e-06	1.3e-08	-6.03	9.44	-1.09
223649_s_at	4.66e-06	1.32e-08	-6.03	9.42	-0.38	SLC25A39	solute carrier family 25 member 39
217892_s_at	4.66e-06	1.32e-08	-6.03	9.42	-0.86	LIMA1	LIM domain and actin binding 1
223064_at	4.66e-06	1.33e-08	-6.03	9.41	-0.33	RNF181	ring finger protein 181
209007_s_at	4.66e-06	1.33e-08	6.03	9.41	0.35	RSRP1	arginine and serine rich protein 1
1562777_at	4.75e-06	1.36e-08	6.02	9.39	0.89	ERV3-1	endogenous retrovirus group 3 member 1
227656_at	4.76e-06	1.38e-08	-6.02	9.38	-0.46	ERMARD	ER membrane associated RNA degradation
225719_s_at	4.76e-06	1.38e-08	-6.02	9.37	-0.4	MRPL55	mitochondrial ribosomal protein L55
218480_at	4.82e-06	1.41e-08	-6.01	9.36	-0.58	AGBL5	ATP/GTP binding protein like 5
201023_at	4.83e-06	1.43e-08	6.01	9.35	0.35	TAF7	TATA-box binding protein associated factor 7
1553159_at	4.83e-06	1.43e-08	-6.01	9.34	-0.46	DNAH11	dynein axonemal heavy chain 11
229109_s_at	4.83e-06	1.44e-08	-6.01	9.34	-0.62	BLVRA	biliverdin reductase A
225339_at	4.95e-06	1.5e-08	6	9.3	0.47	SPAG9	sperm associated antigen 9
243604_at	4.95e-06	1.54e-08	6	9.28	1.02
208921_s_at	4.95e-06	1.54e-08	-6	9.28	-0.4	SRI	sorcin
218735_s_at	4.95e-06	1.54e-08	-6	9.27	-0.62	ZNF544	zinc finger protein 544
229323_at	4.95e-06	1.54e-08	-6	9.27	-1.01	LINC00959	long intergenic non-protein coding RNA 959
203773_x_at	4.95e-06	1.54e-08	-6	9.27	-0.58	BLVRA	biliverdin reductase A
203289_s_at	4.95e-06	1.54e-08	-6	9.27	-0.42	NPRL3	NPR3 like, GATOR1 complex subunit
218464_s_at	4.95e-06	1.55e-08	-6	9.27	-0.38	FAM222B	family with sequence similarity 222 member B
205259_at	5.01e-06	1.57e-08	-5.99	9.25	-0.66	NR3C2	nuclear receptor subfamily 3 group C member 2
222472_at	5.19e-06	1.64e-08	5.98	9.21	0.25	AFTPH	aftiphilin
220736_at	5.26e-06	1.68e-08	-5.98	9.19	-1.14	SLC19A3	solute carrier family 19 member 3
240111_at	5.26e-06	1.68e-08	5.98	9.19	0.45	RHOBTB3	Rho related BTB domain containing 3
206833_s_at	5.36e-06	1.73e-08	-5.97	9.17	-0.52	LOC101927144///ACYP2	uncharacterized LOC101927144///acylphosphatase 2
1554514_at	5.36e-06	1.73e-08	-5.98	9.16	-1.24	ACSM5	acyl-CoA synthetase medium-chain family member 5
201844_s_at	5.43e-06	1.78e-08	5.97	9.14	0.62	RYBP	RING1 and YY1 binding protein
219162_s_at	5.43e-06	1.8e-08	-5.97	9.13	-0.6	MRPL11	mitochondrial ribosomal protein L11
215354_s_at	5.43e-06	1.8e-08	-5.96	9.13	-0.58	PELP1	proline, glutamate and leucine rich protein 1
217918_at	5.43e-06	1.81e-08	-5.96	9.12	-0.3	DYNLRB1	dynein light chain roadblock-type 1
201522_x_at	5.43e-06	1.82e-08	-5.96	9.12	-0.71	SNURF///SNRPN	SNRPN upstream reading frame///small nuclear ribonucleoprotein polypeptide N
211113_s_at	5.43e-06	1.82e-08	-5.96	9.12	-0.54	ABCG1	ATP binding cassette subfamily G member 1
227750_at	5.43e-06	1.83e-08	-5.96	9.11	-0.96	KALRN	kalirin, RhoGEF kinase
201941_at	5.43e-06	1.84e-08	5.96	9.11	0.45	CPD	carboxypeptidase D
200649_at	5.47e-06	1.86e-08	-5.96	9.1	-0.44	NUCB1	nucleobindin 1
215227_x_at	5.47e-06	1.9e-08	-5.95	9.07	-0.37	ACP1	acid phosphatase 1, soluble
207573_x_at	5.47e-06	1.91e-08	-5.95	9.07	-0.28	ATP5L	ATP synthase, H+ transporting, mitochondrial Fo complex subunit G
226127_at	5.47e-06	1.91e-08	-5.95	9.07	-0.63	ALKBH3	alkB homolog 3, alpha-ketoglutaratedependent dioxygenase
229011_at	5.47e-06	1.92e-08	5.95	9.07	0.68	EMP1	epithelial membrane protein 1
201216_at	5.47e-06	1.92e-08	-5.95	9.07	-0.49	ERP29	endoplasmic reticulum protein 29
218504_at	5.47e-06	1.92e-08	-5.95	9.07	-0.74	FAHD2A	fumarylacetoacetate hydrolase domain containing 2A
214703_s_at	5.71e-06	2.01e-08	-5.94	9.02	-0.45	MAN2B2	mannosidase alpha class 2B member 2
1556683_x_at	5.71e-06	2.04e-08	5.94	9.01	0.5
221452_s_at	5.71e-06	2.04e-08	-5.94	9.01	-0.47	TMEM14B	transmembrane protein 14B
244536_at	5.75e-06	2.06e-08	5.94	9	0.64
39729_at	5.8e-06	2.09e-08	-5.93	8.99	-0.71	PRDX2	peroxiredoxin 2
231928_at	5.83e-06	2.11e-08	-5.93	8.98	-1.04	HES2	hes family bHLH transcription factor 2
230151_at	6.02e-06	2.19e-08	-5.92	8.94	-0.59	SPRYD7	SPRY domain containing 7
222931_s_at	6.02e-06	2.2e-08	-5.92	8.94	-0.57	THNSL1	threonine synthase like 1
205145_s_at	6.03e-06	2.22e-08	-5.92	8.93	-0.62	MYL5	myosin light chain 5
212973_at	6.05e-06	2.24e-08	-5.92	8.92	-0.33	RPIA	ribose 5-phosphate isomerase A
210304_at	6.05e-06	2.25e-08	-5.92	8.92	-0.68	PDE6B	phosphodiesterase 6B
225531_at	6.27e-06	2.34e-08	-5.91	8.88	-0.77	CABLES1	Cdk5 and Abl enzyme substrate 1
218477_at	6.34e-06	2.39e-08	-5.91	8.86	-1.03	TMEM14A	transmembrane protein 14A
205036_at	6.34e-06	2.4e-08	-5.91	8.86	-0.51	LSM6	LSM6 homolog, U6 small nuclear RNA and mRNA degradation associated
1560081_at	6.34e-06	2.4e-08	5.91	8.86	0.41	RAD51-AS1	RAD51 antisense RNA 1 (head to head)
1558739_at	6.4e-06	2.43e-08	5.9	8.84	0.86	BORCS5	BLOC-1 related complex subunit 5
222982_x_at	6.4e-06	2.45e-08	5.9	8.84	0.27	SLC38A2	solute carrier family 38 member 2
225646_at	6.48e-06	2.49e-08	-5.9	8.82	-0.57	CTSC	cathepsin C
213772_s_at	6.48e-06	2.52e-08	-5.9	8.81	-0.6	GGA2	golgi associated, gamma adaptin ear containing, ARF binding protein 2
1567627_at	6.48e-06	2.52e-08	-5.9	8.81	-0.66	CD74	CD74 molecule
228454_at	6.48e-06	2.53e-08	5.9	8.81	0.41	LCOR	ligand dependent nuclear receptor corepressor
220859_at	6.55e-06	2.57e-08	5.89	8.79	0.53
202697_at	6.55e-06	2.57e-08	-5.89	8.79	-0.35	NUDT21	nudix hydrolase 21
214769_at	6.57e-06	2.6e-08	-5.89	8.78	-1.05	CLCN4	chloride voltage-gated channel 4
220144_s_at	6.57e-06	2.61e-08	-5.89	8.78	-0.57	ANKEF1	ankyrin repeat and EF-hand domain containing 1
211922_s_at	6.62e-06	2.65e-08	-5.89	8.76	-0.66	CAT	catalase
223516_s_at	6.62e-06	2.65e-08	-5.89	8.76	-0.38	TOMM6///PRICKLE4	translocase of outer mitochondrial membrane 6///prickle planar cell polarity protein 4
200006_at	6.62e-06	2.67e-08	-5.88	8.76	-0.39	PARK7	Parkinsonism associated deglycase
225229_at	6.62e-06	2.68e-08	5.88	8.75	0.32	AFF4	AF4/FMR2 family member 4
225359_at	6.64e-06	2.71e-08	-5.88	8.74	-0.48	DNAJC19	DnaJ heat shock protein family (Hsp40) member C19
224946_s_at	6.64e-06	2.72e-08	-5.88	8.74	-0.48	CCDC115	coiled-coil domain containing 115
226163_at	6.64e-06	2.72e-08	-5.88	8.74	-0.69	ZBTB9	zinc finger and BTB domain containing 9
214450_at	6.65e-06	2.74e-08	-5.88	8.73	-1.21	CTSW	cathepsin W
221693_s_at	6.82e-06	2.82e-08	-5.87	8.7	-0.53	MRPS18A	mitochondrial ribosomal protein S18A
200001_at	6.82e-06	2.85e-08	-5.87	8.69	-0.49	CAPNS1	calpain small subunit 1
225066_at	6.82e-06	2.85e-08	5.87	8.69	0.87	PPP2R2D	protein phosphatase 2 regulatory subunit Bdelta
218216_x_at	6.82e-06	2.86e-08	-5.87	8.69	-0.43	ARL6IP4	ADP ribosylation factor like GTPase 6 interacting protein 4
220032_at	6.82e-06	2.88e-08	-5.87	8.68	-0.8	CPED1	cadherin like and PC-esterase domain containing 1
236233_at	6.82e-06	2.9e-08	-5.87	8.68	-0.83	TRIM32	tripartite motif containing 32
1557049_at	6.82e-06	2.91e-08	5.87	8.68	0.74	BTBD19	BTB domain containing 19
216308_x_at	6.82e-06	2.91e-08	-5.87	8.67	-0.59	GRHPR	glyoxylate and hydroxypyruvate reductase
218788_s_at	6.82e-06	2.92e-08	-5.87	8.67	-0.59	SMYD3	SET and MYND domain containing 3
240661_at	6.87e-06	2.95e-08	5.86	8.66	1.07	LOC100506459	uncharacterized LOC100506459
228397_at	6.87e-06	2.98e-08	5.86	8.65	0.58	TUG1	taurine up-regulated 1 (non-protein coding)
209606_at	6.87e-06	2.98e-08	5.86	8.65	0.35	CYTIP	cytohesin 1 interacting protein
202019_s_at	6.87e-06	2.99e-08	-5.86	8.65	-0.43	LANCL1	LanC like 1
1568887_at	6.87e-06	3e-08	5.86	8.64	0.67	LOC102724382	uncharacterized LOC102724382
241370_at	6.89e-06	3.03e-08	5.86	8.64	0.44	LOC286052	uncharacterized LOC286052
228301_x_at	6.89e-06	3.04e-08	-5.86	8.63	-0.37	NDUFB10	NADH:ubiquinone oxidoreductase subunit B10
225477_s_at	6.91e-06	3.06e-08	5.86	8.63	0.39	NR2C2	nuclear receptor subfamily 2 group C member 2
224984_at	6.95e-06	3.09e-08	5.85	8.62	0.48	NFAT5	nuclear factor of activated T-cells 5
226024_at	7e-06	3.12e-08	-5.85	8.61	-0.61	COMMD1	copper metabolism domain containing 1
211569_s_at	7.03e-06	3.15e-08	-5.85	8.6	-1.11	HADH	hydroxyacyl-CoA dehydrogenase
211941_s_at	7.1e-06	3.2e-08	-5.85	8.58	-0.79	PEBP1	phosphatidylethanolamine binding protein 1
200837_at	7.1e-06	3.21e-08	-5.85	8.58	-0.42	BCAP31	B-cell receptor-associated protein 31
41220_at	7.11e-06	3.23e-08	-5.85	8.58	-0.35	44083	septin 9
65585_at	7.11e-06	3.24e-08	-5.84	8.57	-0.57	FAM86DP///FAM86B2///FAM86FP///FAM86B1///FAM86C1	family with sequence similarity 86, member D, pseudogene///family with sequence similarity 86 member B2///family with sequence similarity 86, member A pseudogene///family with sequence similarity 86 member B1///family with sequence similarity 86 member C1

## Sheet: Sheet2
	Gene symbol	Gene title	LASSO				SCAD					MCP
			Gene ID	Estimate	z	P-value	OR	Estimate	z	P-value	OR	Estimate	z	P-value	OR
1	LOC100507634	uncharacterized LOC100507634	1557566_at	0.016	2.652	0.012	1.016	0.011	2.692	0.011	1.011
2			1559495_at	0.015	2.759	0.009	1.015	0.016	2.823	0.007	1.016
3	LINC00693	long intergenic non-protein coding RNA 693	1564250_at	-0.073	-3.042	0.004	0.93	-0.063	-3.055	0.004	0.939
4	LOC102724382	uncharacterized LOC102724382	1568887_at	0.024	2.881	0.006	1.024	0.022	2.934	0.005	1.022
5	TAF15	TATA-box binding protein associated factor 15	202840_at	-0.046	-2.996	0.004	0.955	-0.036	-3.007	0.004	0.965
6	CACNA1G	calcium voltage-gated channel subunit alpha1 G	207869_s_at	0.025	2.671	0.011	1.025	0.021	2.711	0.01	1.021
7	RPIA	ribose 5-phosphate isomerase A	212973_at	-0.189	-3.685	0	0.828	-0.18	-3.712	0	0.836
8	PLCB1	phospholipase C beta 1	213222_at	0.08	2.998	0.004	1.083	0.075	3.04	0.004	1.078
9	PELP1	proline, glutamate and leucine rich protein 1	215354_s_at	-0.108	-3.399	0.001	0.898	-0.114	-3.495	0.001	0.892	-0.517	-5.333	0	0.596
10	SLC38A2	solute carrier family 38 member 2	222982_x_at	0.077	3.163	0.003	1.081	0.083	3.252	0.002	1.087
11	ZNF33A	zinc finger protein 33A	224276_at	0.026	2.87	0.006	1.027	0.026	2.932	0.005	1.027
12	ESYT2	extended synaptotagmin 2	224699_s_at	0.026	2.764	0.009	1.027	0.022	2.805	0.008	1.023
13	STIM2	stromal interaction molecule 2	225250_at	0	-2.578	0.014	1
14	LAMA1	laminin subunit alpha 1	227048_at	-0.158	-3.526	0.001	0.854	-0.152	-3.563	0.001	0.859	-0.036	-3.456	0.001	0.965
15	RNF130	ring finger protein 130	230932_at	0.171	3.596	0.001	1.186	0.173	3.674	0	1.188	0.193	4.031	0	1.213
16	LOC100288675	uncharacterized LOC100288675	234344_at	0.012	2.772	0.009	1.012	0.008	2.815	0.008	1.008
17	AMOTL1	angiomotin like 1	235277_at	-0.216	-3.869	0	0.806	-0.218	-3.952	0	0.804	-0.393	-4.864	0	0.675
18	TMEM182	transmembrane protein 182	238578_at	-0.106	-3.295	0.002	0.9	-0.102	-3.341	0.002	0.903
19	LARP4B	La ribonucleoprotein domain family member 4B	240005_at	0.016	2.697	0.011	1.017	0.012	2.736	0.009	1.012
20			241300_at	-0.029	-2.705	0.01	0.971	-0.023	-2.731	0.01	0.978
21	STX6	syntaxin 6	244041_at	0.083	3.051	0.004	1.087	0.078	3.091	0.003	1.081	0.149	3.741	0	1.16
22			244418_at	0.138	3.437	0.001	1.147	0.135	3.489	0.001	1.144
23	PRDX2	peroxiredoxin 2	39729_at	-0.126	-3.425	0.001	0.882	-0.122	-3.474	0.001	0.885	-0.037	-3.5	0.001	0.964
24	CALD1	caldesmon 1	212077_at									-0.015	-3.313	0.002	0.985
